# Supplementary material for: What Qualities Are Most Important to Making a Point of Care Test Desirable for Clinicians and Others Offering Sexually Transmitted Infection Testing?
Source: PubMed Central journal article supplement (PMC3084795; doi:10.1371/journal.pone.0019263), 2011-04-29
Supplement: pone.0019263.s001.pdf [file pone.0019263.s001.pdf]

# Point-of-Care Testing Survey

## Welcome

Thank you for taking the time to perform our survey. The purpose of this study is to determine what qualities are most important to making a Point of Care Test desirable for clinicians and others offering STI testing. Our hope is that the results of this study will be used to design an ultimate Point of Care Test that is effective and efficient.

The survey should take approximately 10 minutes.

Before beginning the survey, we'd like to ask you a few questions about who referred you to this study. After answering these questions, please choose the "next" button to begin the survey.

How did you hear about this survey?

What is your referral number?

(This can be found in the email that was sent to you, which contained the link to this survey)

# Point-of-Care Testing Survey

## Practice Demographics

Please tell us a little bit about yourself and your practice.  
To answer the following questions, please select a response from the drop down menus.

What is your gender?

In which country do you practice primarily?

What is your profession?

- MD - Medical Doctor
- DO - Doctor of Osteopathy
- NP - Nurse Practitioner
- CNM - Certified Nurse Midwife
- APN - Advanced Practice Nurse
- PA - Physician's Assistant
- RN - Registered Nurse
- Clinic Manager
- Laboratory Director
- Laboratory Technician
- Health Aide
- Other

## Point-of-Care Testing Survey

If you answered "Other" to the question above, please elaborate briefly on your work as it pertains to STD diagnostics.  
To answer this question, please type a response in the box viewed directly below.

Where is your practice located?

What is the best approximation of your primary practice?

- Public Health Clinic
- Federally Qualified Health Center
- Private - Single Practitioner Setting
- Private - Multiple Practitioner Setting
- Private Community Clinic
- Health Maintenance Organization
- College/University

Are you a Medicaid/Medicare managed care provider?

# Point-of-Care Testing Survey

## Current Access

Point of Care Tests for Sexually Transmitted Infections are defined as tests that can be done onsite with results available during the clinic visit and before the patient leaves.

Please indicate which Point-of-Care tests are available to you currently (mark all that apply)

- Vaginal pH
- Gram stain
- Stat RPR
- Wet-Mount test (saline and potassium hydroxide)
- Urine dipstick
- Rapid HIV test (any kind)
- Pregnancy test
- Other

Other (please specify)

## Point-of-Care Testing Survey

Which do you identify as barriers that make it harder to use Point-of-Care Testing?

- Complexity (multiple steps)
- Time frame
- Time-step driven
- Laboratory driven
- Difficulty reading results
- Interruption of workflow
- Unreliability
- Invasiveness
- Perceived wait times for patients
- Other

Other (please specify below)

## Point-of-Care Testing Survey

Of these barriers, which one makes it hardest for you to use Point-Of-Care testing?

- Complexity (multiple steps)
- Time frame
- Time-step driven
- Laboratory driven
- Difficulty reading results
- Interruption of workflow
- Unreliability
- Invasiveness
- Perceived wait times for patients
- Other

Other (please specify below)

# Point-of-Care Testing Survey

## Future tests

If a Point of Care Test were to be developed for one of these STI conditions, which condition would you choose as your FIRST priority for development?

- Chlamydia
- Gonorrhea
- Hepatitis B and/or C
- Herpes Simplex Virus
- HIV (early seroconversion)
- Human papillomavirus
- Syphilis
- Trichomonas

Which condition would you choose as your SECOND priority for development?

- Chlamydia
- Gonorrhea
- Hepatitis B and/or C
- Herpes Simplex Virus
- HIV (early seroconversion)
- Human papillomavirus
- Syphilis
- Trichomonas

## Point-of-Care Testing Survey

Which condition would you choose as your THIR D priority for development?

- Chlamydia
- Gonorrhea
- Hepatitis B and/or C
- Herpes Simplex Virus
- HIV (early seroconversion)
- Human papillomavirus
- Syphilis
- Trichomonas

Which economic factor is more important to you in designing a test?

- The cost of the test from the manufacturer
- The amount of reimbursement received for performing the test



# Point-of-Care Testing Survey

## Build your own test - Question 1

The next 16 questions are designed to determine what Point of Care Test is most important to you. Answer the following questions with your highest priority STI in mind. For example, if you chose chlamydia as your priority STI for Point of Care Testing, then you should answer the questions as if the Point of Care Test you are designing is for chlamydia.

The table shows the probabilities of a correct diagnosis in the presence of the disease, a correct diagnosis in the absence of the disease, the cost of the test, and the time to complete (in minutes).

|        | Probability of Correctly Diagnosed Positive | Probability of Correctly Diagnosed Negative | Cost Per Test | Time to Complete |
|--------|---------------------------------------------|---------------------------------------------|---------------|------------------|
| Test 1 | 80 – 90%                                    | 90%                                         | \$35          | 5 min.           |
| Test 2 | 70 – 80%                                    | 95%                                         | \$35          | 25 min.          |

Which test better suits your needs?

Test 1

Test 2

# Point-of-Care Testing Survey

## Build your own test - Question 2

|        | Probability of Correctly Diagnosed Positive | Probability of Correctly Diagnosed Negative | Cost Per Test | Time to Complete |
|--------|---------------------------------------------|---------------------------------------------|---------------|------------------|
| Test 3 | 80 - 90%                                    | 90%                                         | \$35          | 25 min.          |
| Test 4 | 80 - 90%                                    | 99%                                         | \$20          | 15 min.          |

Which test better suits your needs?

Test 3

Test 4

## Point-of-Care Testing Survey

### Build your own test - Question 3

|        | Probability of Correctly Diagnosed Positive | Probability of Correctly Diagnosed Negative | Cost Per Test | Time to Complete |
|--------|---------------------------------------------|---------------------------------------------|---------------|------------------|
| Test 5 | 70 - 80%                                    | 95%                                         | \$20          | 5 min.           |
| Test 6 | 80 - 90%                                    | 95%                                         | \$50          | 15 min.          |

Which test better suits your needs?

Test 5

Test 6

## Point-of-Care Testing Survey

### Build your own test - Question 4

|        | Probability of Correctly Diagnosed Positive | Probability of Correctly Diagnosed Negative | Cost Per Test | Time to Complete |
|--------|---------------------------------------------|---------------------------------------------|---------------|------------------|
| Test 7 | 80 – 90%                                    | 95%                                         | \$50          | 25 min.          |
| Test 8 | 70 – 80%                                    | 99%                                         | \$20          | 25 min.          |

Which test better suits your needs?

Test 7

Test 8

## Point-of-Care Testing Survey

### Build your own test - Question 5

|         | Probability of Correctly Diagnosed Positive | Probability of Correctly Diagnosed Negative | Cost Per Test | Time to Complete |
|---------|---------------------------------------------|---------------------------------------------|---------------|------------------|
| Test 9  | 90 – 99%                                    | 90%                                         | \$50          | 25 min.          |
| Test 10 | 80 – 90%                                    | 95%                                         | \$20          | 25 min.          |

Which test better suits your needs?

Test 9

Test 10

# Point-of-Care Testing Survey

## Build your own test - Question 6

|         | Probability of Correctly Diagnosed Positive | Probability of Correctly Diagnosed Negative | Cost Per Test | Time to Complete |
|---------|---------------------------------------------|---------------------------------------------|---------------|------------------|
| Test 11 | 90 – 99%                                    | 99%                                         | \$50          | 25 min.          |
| Test 12 | 90 – 99%                                    | 99%                                         | \$20          | 5 min.           |

Which test better suits your needs?

Test 11

Test 12

# Point-of-Care Testing Survey

## Build your own test - Question 7

|         | Probability of Correctly Diagnosed Positive | Probability of Correctly Diagnosed Negative | Cost Per Test | Time to Complete |
|---------|---------------------------------------------|---------------------------------------------|---------------|------------------|
| Test 13 | 90 - 99%                                    | 90%                                         | \$20          | 25 min.          |
| Test 14 | 90 - 99%                                    | 99%                                         | \$35          | 5 min.           |

Which test better suits your needs?

Test 13

Test 14

## Point-of-Care Testing Survey

### Build your own test - Question 8

|         | Probability of Correctly Diagnosed Positive | Probability of Correctly Diagnosed Negative | Cost Per Test | Time to Complete |
|---------|---------------------------------------------|---------------------------------------------|---------------|------------------|
| Test 15 | 90 – 99%                                    | 95%                                         | \$35          | 15 min.          |
| Test 16 | 90 – 99%                                    | 90%                                         | \$50          | 5 min.           |

Which test better suits your needs?

Test 15

Test 16



## Point-of-Care Testing Survey

### Build your own test - Question 9

|         | Probability of Correctly Diagnosed Positive | Probability of Correctly Diagnosed Negative | Cost Per Test | Time to Complete |
|---------|---------------------------------------------|---------------------------------------------|---------------|------------------|
| Test 17 | 70 - 80%                                    | 99%                                         | \$50          | 5 min.           |
| Test 18 | 90 - 99%                                    | 95%                                         | \$50          | 15 min.          |

Which test better suits your needs?

Test 17

Test 18

## Point-of-Care Testing Survey

### Build your own test - Question 10

|         | Probability of Correctly Diagnosed Positive | Probability of Correctly Diagnosed Negative | Cost Per Test | Time to Complete |
|---------|---------------------------------------------|---------------------------------------------|---------------|------------------|
| Test 19 | 80 - 90%                                    | 99%                                         | \$50          | 25 min.          |
| Test 20 | 90 - 99%                                    | 90%                                         | \$35          | 25 min.          |

Which test better suits your needs?

Test 19

Test 20

# Point-of-Care Testing Survey

## Build your own test - Question 11

|         | Probability of Correctly Diagnosed Positive | Probability of Correctly Diagnosed Negative | Cost Per Test | Time to Complete |
|---------|---------------------------------------------|---------------------------------------------|---------------|------------------|
| Test 21 | 70 - 80%                                    | 99%                                         | \$50          | 5 min.           |
| Test 22 | 90 - 99%                                    | 99%                                         | \$20          | 25 min.          |

Which test better suits your needs?

Test 21

Test 22

## Point-of-Care Testing Survey

### Build your own test - Question 12

|         | Probability of Correctly Diagnosed Positive | Probability of Correctly Diagnosed Negative | Cost Per Test | Time to Complete |
|---------|---------------------------------------------|---------------------------------------------|---------------|------------------|
| Test 23 | 70 - 80%                                    | 95%                                         | \$50          | 15 min.          |
| Test 24 | 90 - 99%                                    | 99%                                         | \$35          | 15 min.          |

Which test better suits your needs?

Test 23

Test 24

## Point-of-Care Testing Survey

### Build your own test - Question 13

|         | Probability of Correctly Diagnosed Positive | Probability of Correctly Diagnosed Negative | Cost Per Test | Time to Complete |
|---------|---------------------------------------------|---------------------------------------------|---------------|------------------|
| Test 25 | 90 - 99%                                    | 95%                                         | \$35          | 5 min.           |
| Test 26 | 70 - 80%                                    | 90%                                         | \$35          | 15 min.          |

Which test better suits your needs?

Test 25

Test 26

# Point-of-Care Testing Survey

## Build your own test - Question 14

|         | Probability of Correctly Diagnosed Positive | Probability of Correctly Diagnosed Negative | Cost Per Test | Time to Complete |
|---------|---------------------------------------------|---------------------------------------------|---------------|------------------|
| Test 27 | 90 – 99%                                    | 90%                                         | \$20          | 15 min.          |
| Test 28 | 90 – 99%                                    | 99%                                         | \$35          | 25 min.          |

Which test better suits your needs?

Test 27

Test 28

# Point-of-Care Testing Survey

## Build your own test - Question 15

|         | Probability of Correctly Diagnosed Positive | Probability of Correctly Diagnosed Negative | Cost Per Test | Time to Complete |
|---------|---------------------------------------------|---------------------------------------------|---------------|------------------|
| Test 29 | 70 - 80%                                    | 99%                                         | \$50          | 5 min.           |
| Test 30 | 90 - 99%                                    | 99%                                         | \$35          | 25 min.          |

Which test better suits your needs?

Test 29

Test 30

## Point-of-Care Testing Survey

### Build your own test - Question 16

|         | Probability of Correctly Diagnosed Positive | Probability of Correctly Diagnosed Negative | Cost Per Test | Time to Complete |
|---------|---------------------------------------------|---------------------------------------------|---------------|------------------|
| Test 31 | 90 – 99%                                    | 95%                                         | \$35          | 15 min.          |
| Test 32 | 70 – 80%                                    | 99%                                         | \$35          | 25 min.          |

Which test better suits your needs?

Test 31

Test 32



## Point-of-Care Testing Survey

You have completed the survey.

Thank you very much for your time and input. Your contribution is vital for the success of new Point of Care Tests. If you have any questions, please email Dr. Charlotte Gaydos, Primary Investigator at [cgaydos@jhmi.edu](mailto:cgaydos@jhmi.edu). For more information about our study, you can visit our site at <http://www.hopkinsmedicine.org/Medicine/std/> .
